# Supplementary material
Source: publisher figshare collection journal article supplement (https://tandf.figshare.com/ndownloader/files/18106685)
Supplement: Supplementary file 1 [file 18106685]

# Supplemental online material

**Impact of *in vitro* digestion on gastrointestinal fate and uptake of silver nanoparticles with different surface modifications**

*Ashraf Abdelkhaliq1,2,3, Meike van der Zande1, Anna K. Undas1, Ruud J.B. Peters1, Ivonne, M.C.M. Rietjens2 and Hans Bouwmeester2**

1 RIKILT - Wageningen Research, P.O. Box 230, 6700 AE, Wageningen, the Netherlands

2 Division of Toxicology, Wageningen University, P.O. box 8000, 6700 EA, Wageningen, the Netherlands

3 Food Science and Technology Department, Faculty of Agriculture – Alexandria University, Alexandria, Egypt

* Corresponding author: email: [hans.bouwmeester@wur.nl](mailto:meike.vanderzande@wur.nl)

**Keywords:** silver nanoparticles, surface chemistry, *in vitro* digestion, bioavailability, single particle-ICP-MS


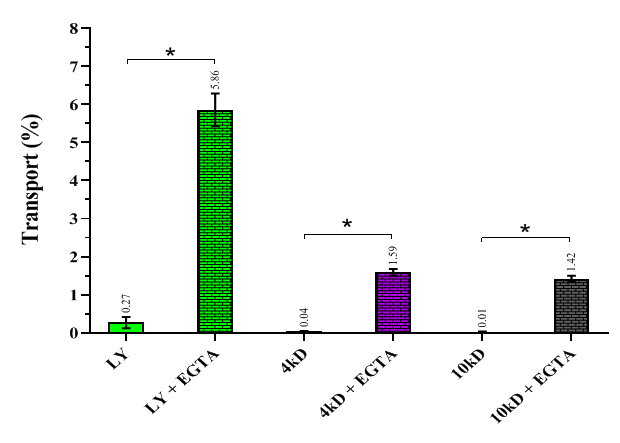


***Figure S1:*** *Cell barrier integrity of a Caco-2/HT29-MTX co-culture transwell model expressed as the % transport (mean ± SD) of lucifer yellow (LY), and 4 kDa and 10 kDa FITC-dextrans in presence and absence of EGTA (tight junction disruptor).* ******* *Significant difference in transport between presence and absence of EGTA (p < 0.05).*

| Table S1: The number of particles in pristine and IVD AgNPs suspensions and in the cell fraction | | | | |
| --- | --- | --- | --- | --- |
| Status | AgNPs | Sample | Concentration (µg/L) | Number of particles ± SD |
| Pristine | (LA) AgNPs | Suspension | 250 | 5.9 × 106 ± 1.4 × 106 |
| 500 | 9.8 × 106 ± 2.3 × 105 |
| 2500 | 2.7 × 107 ± 1.9 × 106 |
| Cell fraction | 250 | 1.8 × 105 ± 4.9 × 104 |
| 500 | 3.1 × 105 ± 4.6 × 104 |
| 2500 | 1.3 × 106 ± 5.1 × 105 |
| (Cit) AgNPs | Suspension | 250 | 8.1 × 106 ± 1.3 × 106 |
| 500 | 1.4 × 107 ± 2.8 × 106 |
| 2500 | 3.5 × 107 ± 5.0 × 106 |
| Cell fraction | 250 | 1.3 × 106 ± 1.6 × 105 |
| 500 | 2.6 × 106 ± 1.7 × 105 |
| 2500 | 4.5 × 106 ± 2.3 × 105 |
| IVD | (LA) AgNPs | Suspension | 250 | 3.2 × 105 ± 4.7 × 104 |
| 500 | 7.1 × 105 ± 2.2 × 105 |
| 2500 | 1.9 × 106 ± 4.5 × 105 |
| Cell fraction | 250 | 2.4 × 105 ± 2.8 × 104 |
| 500 | 4.2 × 105 ± 3.6 × 104 |
| 2500 | 1.3 × 106 ± 1.7 × 105 |
| (Cit) AgNPs | Suspension | 250 | 3.0 × 106 ± 7.8 × 105 |
| 500 | 7.4 × 106 ± 2.8 × 105 |
| 2500 | 2.0 × 107 ± 5.8 × 106 |
| Cell fraction | 250 | 2.1 × 105 ± 2.6 × 104 |
| 500 | 4.4 × 105 ± 6.0 × 104 |
| 2500 | 1.9 × 106 ± 1.8 × 105 |
